# Supplementary material for: A mononuclear nine-coordinated Dy(iii) complex exhibiting field-induced single-ion magnetism behaviour
Source: Royal Society of Chemistry journal article supplement (doi:10.1039/d2ra02260e), 2022-01-01
Supplement: d2ra02260e1.pdf [file d2ra02260e1.pdf]

## Supporting Information

### **A mononuclear nine-coordinated Dy(III) complex exhibiting field-induced single-ion magnetism behaviour**

Biao Hu,<sup>a#</sup> Jing Xi,<sup>a#</sup> Peipei Cen,<sup>b</sup> Yan Guo,<sup>a</sup> Yi Ding,<sup>\*,a</sup> Yuanyuan Qin,<sup>a</sup> Yi-Quan Zhang,<sup>\*,c</sup> and Xiangyu Liu<sup>\*,a</sup>

<sup>a</sup> State Key Laboratory of High-efficiency Utilization of Coal and Green Chemical Engineering, College of Chemistry and Chemical Engineering, Ningxia University, Yinchuan 750021, China. E-mail: xiangyuliu432@126.com; yiding@nxu.edu.cn

<sup>b</sup> College of Public Health and Management, Ningxia Medical University, Yinchuan 750021, China

<sup>c</sup> Jiangsu Key Laboratory for NSLSCS, School of Physical Science and Technology, Nanjing Normal University, Nanjing 210023, China. E-mail: zhangyiquan@njnu.edu.cn

# These authors contributed equally to this work.

#### **\*Corresponding author**

**Prof. Xiangyu Liu**

**E-mail: xiangyuliu432@126.com**

**Dr. Yi Ding**

**E-mail: yiding@nxu.edu.cn**

**Prof. Yi-Quan Zhang**

**zhangyiquan@njnu.edu.cn**

## Contents

**Fig. S1** PXRD curve of complex **1**

**Fig. S2**  $M$  vs  $H$  curves for **1** at basic temperatures.

**Fig. S3** Temperature dependence curves of  $\chi_M'$  and  $\chi_M''$  susceptibilities without dc field

**Fig. S4** Calculated complete structure of complex **1**; H atoms are omitted.

**Fig. S5** Packing diagram of complex **1** along b axis.

**Fig. S6** Plot of  $\tau$  vs.  $H$  for **1** under different dc fields.

**Table. S1** Selected bond lengths (Å) and bond angles (°) for complex **1**.

**Table. S2** Dy(III) ions geometry analysis of **1** by SHAPE 2.1 software.

**Table. S3** Relaxation fitting parameters from least-squares fitting of  $\chi(f)$  data under 2000 Oe dc field of **1**.

**Table. S4** Structural and magnetic parameters for the reported nine-coordinated mononuclear Dy(III) SMMs.

**Table. S5** In wave functions with definite projection of the total moment  $|JM\rangle$  for the lowest three Kramers doublets (KDs) of the Dy(III) for complex **1**.

**Table. S6** *ab initio* computed crystal-field parameters for complex **1**.

**Table. S7** Natural Bond Order (NBO) charges per atoms in the ground state of complex **1** calculated within CASSCF.

## References

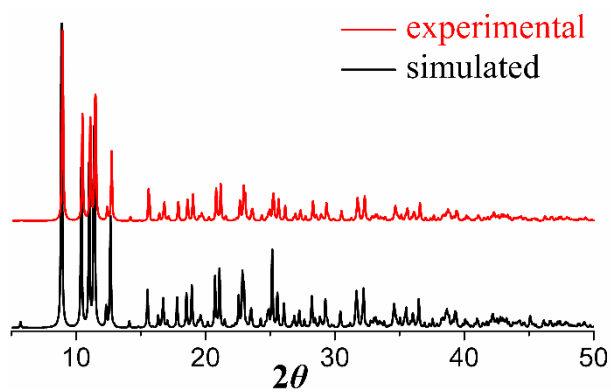

Fig. S1 PXR D curve of complex 1

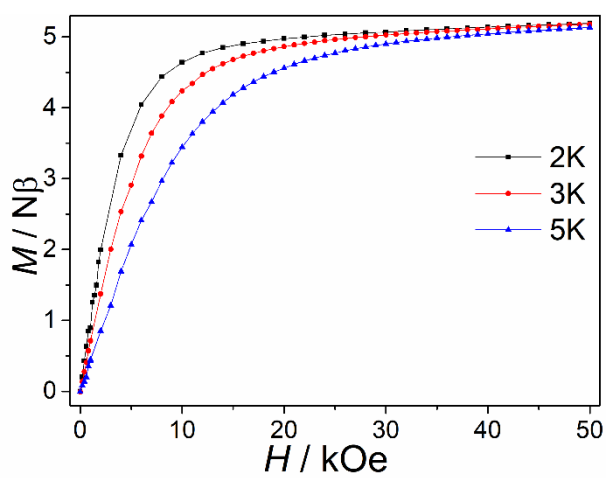

Fig. S2  $M$  vs  $H$  curves for 1 at basic temperatures.

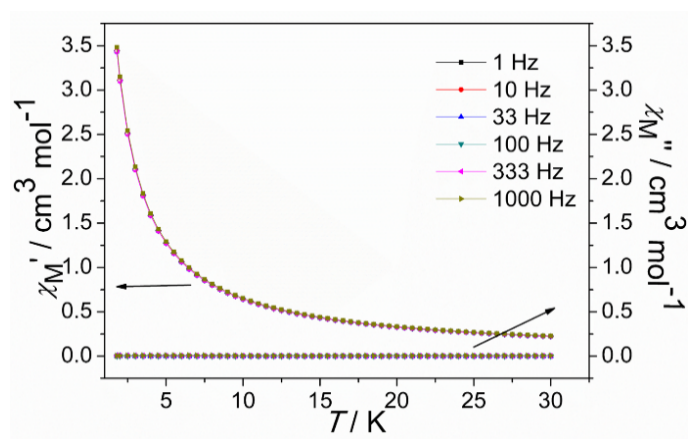

Fig. S3 Temperature dependence curves of  $\chi_M'$  and  $\chi_M''$  susceptibilities without dc field

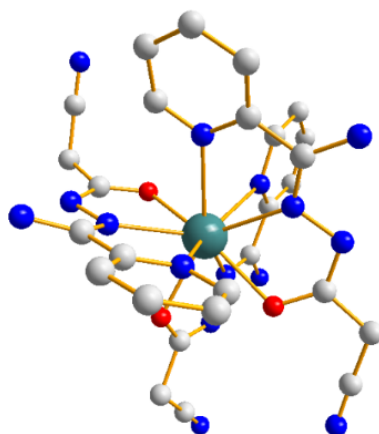

Fig. S4 Calculated complete structure of complex 1; H atoms are omitted.

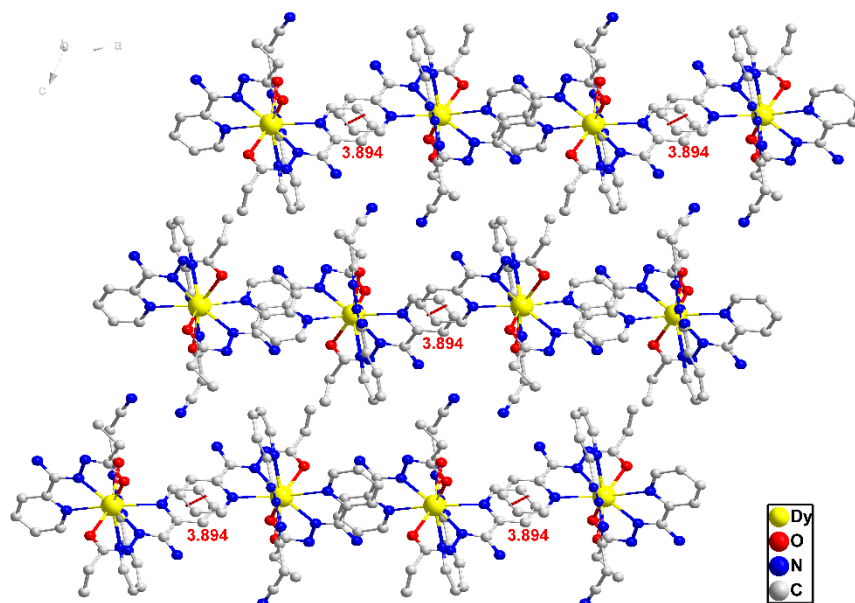

Fig. S5 Packing diagram of complex 1 along b axis.

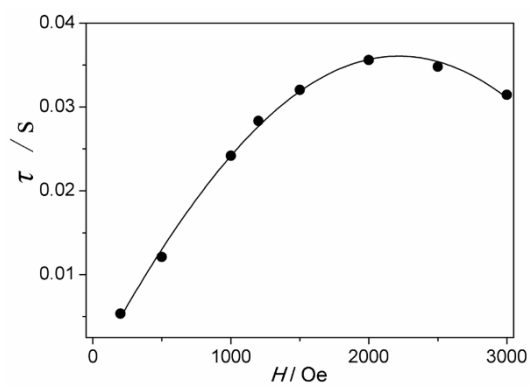

Fig. S6 Plot of  $\tau$  vs.  $H$  for 1 under different dc fields.

**Table. S1** Selected bond lengths (Å) and bond angles (°) for complex **1**.

| Complex <b>1</b>  |            |                   |            |
|-------------------|------------|-------------------|------------|
| Dy(1)-O(3)        | 2.350(4)   | O(1)-Dy(1)-O(2)   | 150.74(15) |
| Dy(1)-O(2)        | 2.395(4)   | O(1)-Dy(1)-N(3)   | 64.23(15)  |
| Dy(1)-O(1)        | 2.390(4)   | O(1)-Dy(1)-N(6)   | 81.14(15)  |
| Dy(1)-N(3)        | 2.441(5)   | O(1)-Dy(1)-N(13)  | 79.49(16)  |
| Dy(1)-N(6)        | 2.640(5)   | O(1)-Dy(1)-N(11)  | 72.45(15)  |
| Dy(1)-N(13)       | 2.445(5)   | O(1)-Dy(1)-N(1)   | 126.25(16) |
| Dy(1)-N(11)       | 2.619(5)   | O(1)-Dy(1)-N(8)   | 133.29(16) |
| Dy(1)-N(1)        | 2.607(5)   | N(3)-Dy(1)-N(6)   | 74.16(17)  |
| Dy(1)-N(8)        | 2.476(5)   | N(3)-Dy(1)-N(13)  | 123.79(18) |
| O(3)-Dy(1)- O(2)  | 74.84(15)  | N(3)-Dy(1)-N(11)  | 132.59(16) |
| O(3)-Dy(1)- O(1)  | 91.05(16)  | N(3)-Dy(1)-N(1)   | 62.74(17)  |
| O(3)-Dy(1)- N(3)  | 74.02(16)  | N(3)-Dy(1)-N(8)   | 124.67(17) |
| O(3)-Dy(1)- N(6)  | 147.47(16) | N(13)-Dy(1)-N(6)  | 142.31(16) |
| O(3)-Dy(1)- N(13) | 64.89(15)  | N(13)-Dy(1)-N(11) | 62.15(17)  |
| O(3)-Dy(1)- N(11) | 126.45(15) | N(13)-Dy(1)-N(1)  | 139.84(17) |
| O(3)-Dy(1)- N(1)  | 82.67(16)  | N(13)-Dy(1)-N(8)  | 111.52(17) |
| O(3)-Dy(1)- N(8)  | 135.33(16) | N(11)-Dy(1)-N(6)  | 81.28(16)  |
| O(2)-Dy(1)- N(3)  | 132.14(16) | N(1)-Dy(1)-N(6)   | 76.98(16)  |
| O(2)-Dy(1)- N(6)  | 124.07(16) | N(1)-Dy(1)-N(11)  | 147.73(17) |
| O(2)-Dy(1)- N(13) | 71.34(16)  | N(8)-Dy(1)-N(6)   | 62.43(17)  |
| O(2)-Dy(1)- N(11) | 95.21(16)  | N(8)-Dy(1)-N(11)  | 73.92(16)  |
| O(2)-Dy(1)-N(1)   | 78.03(16)  | N(8)-Dy(1)-N(1)   | 74.96(16)  |
| O(2)-Dy(1)-N(8)   | 63.07(16)  | C(6)-N(3)- Dy(1)  | 126.4(4)   |

**Table. S2** Dy(III) ions geometry analysis of **1** by SHAPE 2.1 software.Dy(III) ion geometry analysis of **1**

|          |        |                                    |
|----------|--------|------------------------------------|
| HBPY-9   | 3 D7h  | Heptagonal bipyramid               |
| JTC-9    | 4 C3v  | Johnson triangular cupola J3       |
| JCCU-9   | 5 C4v  | Capped cube J8                     |
| CCU-9    | 6 C4v  | Spherical-relaxed capped cube      |
| JCSAPR-9 | 7 C4v  | Capped square antiprism J10        |
| CSAPR-9  | 8 C4v  | Spherical capped square antiprism  |
| JTCTPR-9 | 9 D3h  | Tricapped trigonal prism J51       |
| TCTPR-9  | 10 D3h | Spherical tricapped trigonal prism |
| JTDIC-9  | 11 C3v | Tridiminished icosahedron J63      |
| HH-9     | 12 C2v | Hula-hoop                          |
| MFF-9    | 13 Cs  | Muffin                             |

|                 |           |         |        |        |          |         |          |         |         |         |       |
|-----------------|-----------|---------|--------|--------|----------|---------|----------|---------|---------|---------|-------|
| Structure [ML9] | HBPY-9    | JTC-9   | JCCU-9 | CCU-9  | JCSAPR-9 | CSAPR-9 | JTCTPR-9 | TCTPR-9 | JTDIC-9 | HH-9    | MFF-9 |
| ABOXIY          | , 16.576, | 14.279, | 8.934, | 7.431, | 2.529,   | 1.330,  | 3.251,   | 1.811,  | 10.676, | 11.056, | 1.536 |

| Configuration                                   | ABOXIY, <b>1</b> |
|-------------------------------------------------|------------------|
| Heptagonal bipyramid ( $D_{7h}$ )               | 16.576           |
| Johnson triangular cupola J3 ( $C_{3v}$ )       | 14.279           |
| Capped cube J8 ( $C_{4v}$ )                     | 8.934            |
| Spherical-relaxed capped cube ( $C_{4v}$ )      | 7.431            |
| Capped square antiprism J10 ( $C_{4v}$ )        | 2.529            |
| Spherical capped square antiprism ( $C_{4v}$ )  | <b>1.330</b>     |
| Tricapped trigonal prism J51 ( $D_{3h}$ )       | 3.251            |
| Spherical tricapped trigonal prism ( $D_{3h}$ ) | 1.811            |
| Tridiminished icosahedron J63 ( $C_{3v}$ )      | 10.676           |
| Hula-hoop ( $C_{2v}$ )                          | 11.056           |
| Muffin ( $C_s$ )                                | 1.536            |

**Table. S3** Relaxation fitting parameters from least-squares fitting of  $\chi(f)$  data under 2000 Oe dc field of 1.

| T(K) | $\chi_T$ | $\chi_S$ | $\alpha$ |
|------|----------|----------|----------|
| 2    | 0.035611 | 0.193631 | 0.000189 |
| 3    | 0.076706 | 0.013461 | 0.256001 |
| 4    | 0.016252 | 0.014854 | 0.165243 |
| 4.5  | 0.007006 | 0.018348 | 0.123448 |
| 5    | 0.003328 | 0.017357 | 0.109393 |
| 5.5  | 0.001636 | 0.017234 | 0.105143 |
| 6    | 0.000853 | 0.022761 | 0.098265 |
| 6.5  | 0.000463 | 0.016994 | 0.112061 |
| 7    | 0.00025  | 0.006492 | 0.123548 |
| 7.5  | 0.000134 | 1.02E-07 | 0.135951 |
| 8    | 7.05E-05 | 1.57E-07 | 0.17384  |
| 9    | 1.62E-05 | 2.32E-07 | 0.281026 |
| 10   | 4E-06    | 3.4E-07  | 0.350573 |

**Table. S4** Structural and magnetic parameters for the reported nine-coordinated mononuclear Dy(III) SMMs.<sup>S1</sup>

| molecular formula                                                                                                                                                      | $r_{\text{shortestDy-O}}/\text{\AA}$ | $r_{\text{longestDy-O}}/\text{\AA}$ | $r_{\text{longest}}/\text{\AA}$ | configuration                         | $r_{\text{longest}}/\text{\AA}$ -<br>$r_{\text{shortestDy-O}}/\text{\AA}$ | $r_{\text{longest}}/\text{\AA}$ -<br>$r_{\text{longestDy-O}}/\text{\AA}$ | $U_{\text{eff}}/k_B/K$ | dc<br>field/Oe | $\tau_0/s$             |
|------------------------------------------------------------------------------------------------------------------------------------------------------------------------|--------------------------------------|-------------------------------------|---------------------------------|---------------------------------------|---------------------------------------------------------------------------|--------------------------------------------------------------------------|------------------------|----------------|------------------------|
| [Dy(H <sub>2</sub> L)(NO <sub>3</sub> )(H <sub>2</sub> O)(EtOH)](NO <sub>3</sub> ) <sub>2</sub> ·H <sub>2</sub> O <sup>S1a</sup>                                       | 2.322                                | 2.533                               | 2.533                           | <i>C<sub>s</sub></i>                  | 0.211                                                                     | 0                                                                        | 20.63                  | 1000           | $2.69 \times 10^{-7}$  |
| [Dy(Htpy)(NO <sub>3</sub> ) <sub>2</sub> (acac)] <sup>S1b</sup>                                                                                                        | 2.257                                | 2.529                               | 2.533                           | <i>C<sub>s</sub></i>                  | 0.276                                                                     | 0.004                                                                    | 22.7                   | 0              | $6.98 \times 10^{-7}$  |
| [Dy(H <sub>3</sub> daps)(H <sub>2</sub> O) <sub>2</sub> (NO <sub>3</sub> ) <sub>2</sub> ·(NO <sub>3</sub> ) <sub>2</sub> ·(MeOH)] <sup>S1c</sup>                       | 2.305                                | 2.53                                | 2.532                           | <i>C<sub>s</sub></i>                  | 0.227                                                                     | 0.002                                                                    | 23.8                   | 2000           | $9.14 \times 10^{-5}$  |
| [Dy(2,3'-pcad)(NO <sub>3</sub> )-(H <sub>2</sub> O) <sub>4</sub> ·NO <sub>3</sub> ·H <sub>2</sub> O] <sup>S1d</sup>                                                    | 2.307                                | 2.564                               | 2.579                           | <i>C<sub>4v</sub></i>                 | 0.272                                                                     | 0.015                                                                    | 24.95                  | 1200           | $5.5 \times 10^{-8}$   |
| [Dy(L)(NO <sub>3</sub> )(EtOH) <sub>2</sub> ] <sub>(SR)</sub> <sup>S1a</sup>                                                                                           | 2.291                                | 2.502                               | 2.525                           | <i>C<sub>s</sub></i>                  | 0.234                                                                     | 0.023                                                                    | 28.49                  | 1000           | $6.22 \times 10^{-7}$  |
| [Dy(H <sub>4</sub> daps)(H <sub>2</sub> O) <sub>3</sub> (NO <sub>3</sub> ) <sub>2</sub> ·(NO <sub>3</sub> ) <sub>2</sub> ·(H <sub>2</sub> O)] <sup>S1c</sup>           | 2.351                                | 2.455                               | 2.548                           | <i>C<sub>s</sub></i>                  | 0.197                                                                     | 0.093                                                                    | 32.7                   | 2000           | $1.82 \times 10^{-6}$  |
| [Dy(quinbeyz)(NO <sub>3</sub> ) <sub>2</sub> (DMF)] <sup>S1e</sup>                                                                                                     | 2.296                                | 2.491                               | 2.537                           | <i>C<sub>4v</sub></i>                 | 0.241                                                                     | 0.046                                                                    | 34.8                   | 1000           | $1.4 \times 10^{-6}$   |
| [Dy(2,3'-Hpcad) <sub>2</sub> (H <sub>2</sub> O) <sub>3</sub> ·3Cl·5H <sub>2</sub> O] <sup>S1d</sup>                                                                    | 2.384                                | 2.431                               | 2.59                            | <i>C<sub>4v</sub></i>                 | 0.206                                                                     | 0.159                                                                    | 39.2                   | 0              | $3.4 \times 10^{-6}$   |
| [Dy(2,3'-pcad)(NO <sub>3</sub> ) <sub>2</sub> (CH <sub>3</sub> OH) <sub>2</sub> ] <sup>S1d</sup>                                                                       | 2.258                                | 2.54                                | 2.569                           | <i>D<sub>3h</sub></i>                 | 0.311                                                                     | 0.029                                                                    | 56.11                  | 1200           | $2.9 \times 10^{-6}$   |
| [Dy(L)(NO <sub>3</sub> )(EtOH) <sub>1</sub> ] <sub>(FR)</sub> <sup>S1a</sup>                                                                                           | 2.291                                | 2.502                               | 2.525                           | <i>C<sub>s</sub></i>                  | 0.234                                                                     | 0.023                                                                    | 57.52                  | 1000           | $1.53 \times 10^{-12}$ |
| [(C <sub>12</sub> H <sub>10</sub> N <sub>5</sub> O)Dy(NO <sub>3</sub> ) <sub>2</sub> (H <sub>2</sub> O) <sub>2</sub> ·C <sub>2</sub> H <sub>5</sub> OH] <sup>S1f</sup> | 2.319                                | 2.538                               | 2.607                           | <i>C<sub>4v</sub>, D<sub>3h</sub></i> | 0.288                                                                     | 0.069                                                                    | 58.99                  | 500            | $1.16 \times 10^{-9}$  |
| [Dy(HL <sup>4</sup> ) <sub>3</sub> (NO <sub>3</sub> ) <sub>3</sub> ] <sup>S1g</sup>                                                                                    | 2.291                                | 2.513                               | 2.513                           | <i>C<sub>s</sub></i>                  | 0.222                                                                     | 0                                                                        | 62                     | 2000           | $6.11 \times 10^{-10}$ |
| [Dy(HL <sup>3</sup> ) <sub>3</sub> (NO <sub>3</sub> ) <sub>3</sub> ·CH <sub>3</sub> CN] <sup>S1g</sup>                                                                 | 2.296                                | 2.495                               | 2.495                           | <i>C<sub>4v</sub></i>                 | 0.199                                                                     | 0                                                                        | 66                     | 2000           | $1.29 \times 10^{-10}$ |
| [Dy(HL <sup>1</sup> ) <sub>2</sub> (NO <sub>3</sub> ) <sub>3</sub> (CH <sub>3</sub> OH)] <sup>S1g</sup>                                                                | 2.28                                 | 2.504                               | 2.504                           | <i>D<sub>3h</sub></i>                 | 0.224                                                                     | 0                                                                        | 67                     | 1000           | $9.72 \times 10^{-8}$  |
| Dy(Hcpt) <sub>3</sub> ·2H <sub>2</sub> O <sup>this work</sup>                                                                                                          | 2.35                                 | 2.395                               | 2.64                            | <i>C<sub>4v</sub></i>                 | 0.29                                                                      | 0.245                                                                    | 97.90                  | 2000           | $3.57 \times 10^{-10}$ |
| Dy(bpad) <sub>3</sub> ·CH <sub>3</sub> OH·H <sub>2</sub> O <sup>S1h</sup>                                                                                              | 2.352                                | 2.366                               | 2.639                           | <i>C<sub>4v</sub></i>                 | 0.287                                                                     | 0.273                                                                    | 106.93                 | 1200           | $2.28 \times 10^{-8}$  |
| [Dy(HL <sup>2</sup> ) <sub>2</sub> (NO <sub>3</sub> ) <sub>3</sub> (H <sub>2</sub> O)] <sup>S1g</sup>                                                                  | 2.308                                | 2.498                               | 2.498                           | <i>C<sub>s</sub></i>                  | 0.19                                                                      | 0                                                                        | 116                    | 2000           | $8.72 \times 10^{-11}$ |
| [(C <sub>12</sub> H <sub>10</sub> N <sub>5</sub> O)Dy(NO <sub>3</sub> ) <sub>2</sub> (C <sub>2</sub> H <sub>5</sub> OH) <sub>2</sub> ·H <sub>2</sub> O] <sup>S1f</sup> | 2.275                                | 2.538                               | 2.888                           | <i>C<sub>4v</sub></i>                 | 0.613                                                                     | 0.35                                                                     | 203.11                 | 0              | $1.77 \times 10^{-9}$  |
| {[Dy(CH <sub>3</sub> OH)(NO <sub>3</sub> ) <sub>2</sub> (tpy)]·CH <sub>3</sub> OH} <sub>n</sub> <sup>S1b</sup>                                                         | 2.149                                | 2.549                               | 2.549                           | <i>C<sub>s</sub></i>                  | 0.4                                                                       | 0                                                                        | 354.36                 | 0              | $1.4 \times 10^{-10}$  |

H<sub>2</sub>L=2,6-diylbis(ethan-1-yl-ylidene)di(isonicotinohydrazide); Hacac = acetylacetonate; Htpy = 4'- (4-hydroxyphenyl)-2,2':6',2''-terpyridine; H<sub>4</sub>daps = 2,6-bis(2-salicyloylhydrazonoethyl)pyridine; H<sub>4</sub>daps = 2,6-bis(1-salicyloylhydrazonoethyl)pyridine; 2,3'-Hpcad = N<sup>3</sup>-(2-pyridoyl)-3-pyridinecarboxamidrazone; quinbeyz = 8-hydroxyquinoline-2-carboxyaldehyde-(benzoyl)hydrazine; HL = N<sup>3</sup>-(2-pyridoyl)-4-pyridinecarboxamidrazone; HL<sup>4</sup>=1-[N-(4-iodophenyl)]aminomethylidene-2(1H)naphthalenone; HL<sup>3</sup>=1-[N-(4-methoxy)]aminomethylidene-2(1H)naphthalenone; HL<sup>1</sup>=1-[N-(4-chlorophenyl)]aminomethylidene-2(1H)naphthalenone; HL<sup>2</sup>=1-[N-(4-nitrophenyl)]aminomethylidene-2(1H)naphthalenone; Hbpad = N<sup>3</sup>-benzoylpyridine-2-carboxamidrazone; Hcpt=2-cyano-N'-(1-(pyridin-2-yl)amido)acetyl.



**Table. S5** In wave functions with definite projection of the total moment  $|JM\rangle$  for the lowest three Kramers doublets (KDs) of the Dy(III) for complex **1**.

|          | $E/\text{cm}^{-1}$ | wave functions                                                                           |
|----------|--------------------|------------------------------------------------------------------------------------------|
| <b>1</b> | 0.0                | $94\% \pm 15/2\rangle + 0.4\% \pm 9/2\rangle$                                            |
|          | 140.57             | $4\% \pm 15/2\rangle + 20\% \pm 13/2\rangle + 38\% \pm 9/2\rangle + 30\% \pm 7/2\rangle$ |
|          | 181.07             | $2\% \pm 15/2\rangle + 65\% \pm 13/2\rangle + 26\% \pm 11/2\rangle + 5\% \pm 7/2\rangle$ |

**Table. S6** *ab initio* computed crystal-field parameters for complex **1**.

| k | q  | $B_{kq}$              |
|---|----|-----------------------|
| 2 | -2 | 0.34920108741873E+00  |
| 2 | -1 | 0.10623695699148E+01  |
| 2 | 0  | -0.16683513847537E+01 |
| 2 | 1  | 0.22724392178449E+00  |
| 2 | 2  | 0.15351060150934E+01  |
| 4 | -4 | -0.10070380334743E-01 |
| 4 | -3 | -0.14349137952895E-01 |
| 4 | -2 | 0.49177326240960E-02  |
| 4 | -1 | -0.12457495719780E-01 |
| 4 | 0  | -0.22714814504834E-02 |
| 4 | 1  | 0.17428047599169E-01  |
| 4 | 2  | -0.12194137289474E-02 |
| 4 | 3  | 0.24460325516696E-01  |
| 4 | 4  | 0.25313908551810E-02  |
| 6 | -6 | -0.13332171208156E-03 |
| 6 | -5 | 0.79185311618547E-04  |
| 6 | -4 | 0.13304569021568E-03  |
| 6 | -3 | 0.46855867085394E-03  |
| 6 | -2 | -0.38518926294551E-04 |
| 6 | -1 | 0.88438758948006E-04  |
| 6 | 0  | -0.32165464267250E-04 |
| 6 | 1  | -0.26286752285944E-03 |
| 6 | 2  | -0.33416013164089E-04 |
| 6 | 3  | 0.54028643402664E-04  |
| 6 | 4  | 0.26863954347958E-04  |
| 6 | 5  | 0.36814372298679E-03  |
| 6 | 6  | 0.24222901262908E-03  |

**Table. S7** Natural Bond Order (NBO) charges per atoms in the ground state of complex **1** calculated within CASSCF.

|    | <b>1</b> |
|----|----------|
| Dy | 2.4555   |
| O1 | -0.8160  |
| O2 | -0.7834  |
| O3 | -0.8132  |
| N1 | -0.3561  |
| N2 | -0.3470  |
| N3 | -0.3289  |
| N4 | -0.3351  |
| N5 | -0.3325  |
| N6 | -0.3875  |

## References

- S1. (a) J. Wang, H. Wang, Y. Ma, J. Tang, L. Li, Q. Wang, B. Zhao, P. Cheng, and J. Ma, *Cryst. Growth Des.*, 2019, **19**, 3365-3371; (b) Y. Li, Y. You, P. Zhao, *Inorg. Chem.*, 2021, **60**, 11419-11428. (c) A. K. Mondal, S. Goswami, and S. Konar, *Dalton Trans.*, 2015, **44**, 5086-5094; (d) L. Sun, S. Zhang, C. Qiao, S. Chen, B. Yin, W. Wang, Q. Wei, G. Xie, and S. Gao, *Inorg. Chem.*, 2016, **55**, 10587-10596; (e) C.-L. Ji, Y.-X. Jiang, J.-C. Zhang, Z.-Y. Qi, J.-J. Kong, and X.-C. *Inorg. Chem.*, 2018, **644**, 1635-1640; (f) L. Sun, S. Zhang, Z. Jiang, Q. Yang, S. Chen, Y. Zhang, W. Wang, Q. Wei, and G. Xie, *Dalton Trans.*, 2017, **46**, 11159-11165; (g) H. Yang, S.-S. Liu, Y.-S. Meng, Y.-Q. Zhang, L. Pu, X. Wang, and S. Lin, *Dalton Trans.*, 2022, **51**, 1415; (h) X. Liu, X. Ma, W. Yuan, P. Cen, Y.-Q. Zhang, J. Ferrando-Soria, G. Xie, S. Chen, and E. Pardo, *Inorg. Chem.*, 2018, **57**, 14843-14851;
